# Supplementary material for: Predicting pathological highly invasive lung cancer from preoperative [18F]FDG PET/CT with multiple machine learning models
Source: Springer Nature journal article supplement (doi:10.1007/s00259-022-06038-7), 2022-11-17

**A**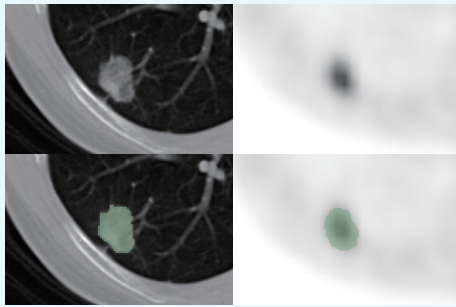

Feature Extraction  
with or without filter

1595 CT features

1595 PET features

Normalize and feature selection with Boruta  
in training set and applying to test set

Normalized selected  
CT features

Normalized selected  
PET features

Normalized selected  
CT and PET features

**B**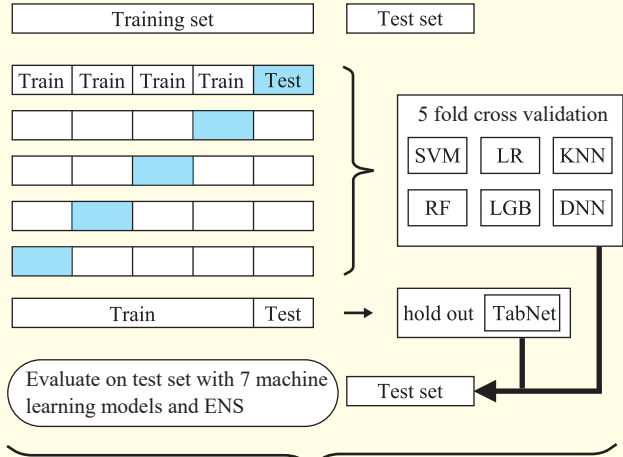

Repeat 100 times with different  
random seeds

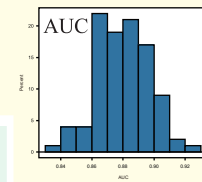**C**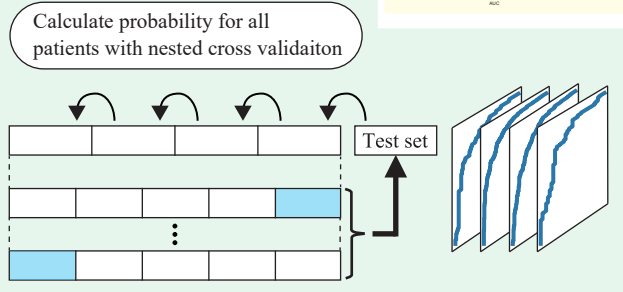

Supplement: MOESM1 [file 23722832]
