# Supplementary material for: Predicting pathological highly invasive lung cancer from preoperative [18F]FDG PET/CT with multiple machine learning models
Source: Springer Nature journal article supplement (doi:10.1007/s00259-022-06038-7), 2022-11-17

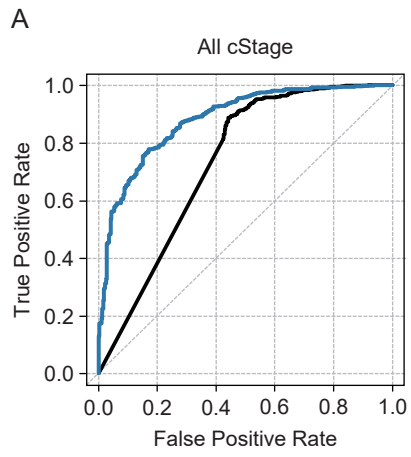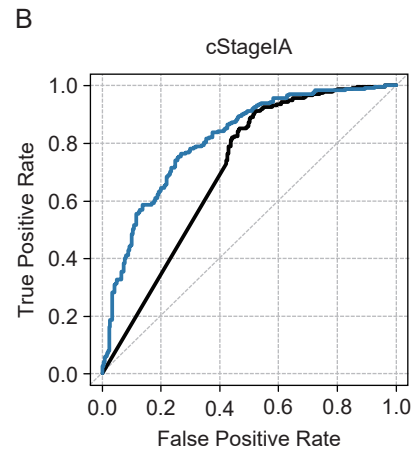

Supplement: MOESM3 [file 23722832]
